# Supplementary material
Source: PubMed Central journal article supplement (PMC8911098)
Supplement: ehp10118.s001.acco.pdf [file ehp10118.s001.acco.pdf]

**Note to readers with disabilities:** *EHP* strives to ensure that all journal content is accessible to all readers. However, some figures and Supplemental Material published in *EHP* articles may not conform to [508 standards](#) due to the complexity of the information being presented. If you need assistance accessing journal content, please contact [ehp508@niehs.nih.gov](mailto:ehp508@niehs.nih.gov). Our staff will work with you to assess and meet your accessibility needs within 3 working days.

### **Supplemental Material**

#### **Gestational Perfluoroalkyl Substance Exposure and DNA Methylation at Birth and 12 Years of Age: A Longitudinal Epigenome-Wide Association Study**

Yun Liu, Melissa N. Eliot, George D. Papandonatos, Karl T. Kelsey, Ruby Fore, Scott Langevin, Jessie Buckley, Aimin Chen, Bruce P. Lanphear, Kim M. Cecil, Kimberly Yolton, Marie-France Hivert, Sharon K. Sagiv, Andrea A. Baccarelli, Emily Oken, and Joseph M. Braun

#### **Table of Contents**

**Table S1.** Characteristics and maternal serum PFAS concentrations for participants with single or both measures of DNA methylation at birth and/or age 12 years in the HOME Study (Cincinnati, OH; Enrolled 2003-2006).

**Table S2.** Baseline and follow-up characteristics and maternal plasma PFAS concentrations in the Project Viva (eastern Massachusetts; Enrolled 1999-2002).

**Table S3.** Distribution of serum per- and polyfluoroalkyl substance (PFAS) concentrations (ng/mL) in pregnancy (n=291) in the HOME Study (Cincinnati, OH; Enrolled 2003-2006).

**Table S4.** Pearson correlation between log<sub>2</sub>-transformed serum per- and polyfluoroalkyl substance (PFAS) concentrations (ng/mL) in pregnancy (n=291) in the HOME study (Cincinnati, OH; Enrolled 2003-2006).

**Table S5.** Genes from statistically significant PFAS associated CpG sites and their potential human health implications in the HOME Study (Cincinnati, OH; Enrolled 2003-2006).

**Table S6.** A list of CpGs with p-value  $\leq 0.001$  provided by prior studies with the same direction of association and p-value  $< 0.05$  observed in the HOME Study (Cincinnati, OH; Enrolled 2003-2006).

**Figure S1.** Directed acyclic graph of potential confounders of the associations between serum PFAS concentrations in pregnancy and DNA methylation at birth and age 12 years in the HOME Study (Cincinnati, OH; Enrolled 2003-2006).

**Figure S2.** Box plot of serum per- and polyfluoroalkyl substance (PFAS) concentrations (ng/mL) in pregnancy in the HOME Study (Cincinnati, OH; Enrolled 2003-2006).

**Figure S3.** Quantile-quantile plots for the associations between gestational PFAS concentrations and repeated measures of DNA methylation in the HOME Study (Cincinnati, OH; Enrolled 2003-2006).

**Additional File-** Excel Document

**Table S1.** Characteristics and maternal serum PFAS concentrations for participants with single or both measures of DNA methylation at birth and/or age 12 years in the HOME Study (Cincinnati, OH; Enrolled 2003-2006).

| Characteristics                              | Both (N= 135)<br>N (%) or Mean (SD)           | Single (N= 156)<br>N (%) or Mean (SD)         |
|----------------------------------------------|-----------------------------------------------|-----------------------------------------------|
| <b>Child sex</b>                             |                                               |                                               |
| Girls                                        | 71 (53)                                       | 83 (53)                                       |
| Boys                                         | 64 (47)                                       | 73 (47)                                       |
| <b>Child age</b>                             | 12.3 (0.7)                                    | 12.4 (0.6)                                    |
| <b>Maternal serum cotinine (ng/mL)</b>       |                                               |                                               |
| <0.015 (Unexposed) <sup>a</sup>              | 37 (28)                                       | 59 (38)                                       |
| 0.015-<3 (Secondhand Tobacco Smoke Exposure) | 88 (65)                                       | 82 (53)                                       |
| ≥3 (Active Smoking)                          | 10 (7)                                        | 15 (9)                                        |
| <b>Maternal race/ethnicity</b>               |                                               |                                               |
| White, non-Hispanic                          | 83 (62)                                       | 101 (65)                                      |
| Black, non-Hispanic                          | 45 (33)                                       | 43 (28)                                       |
| All others                                   | 7 (5)                                         | 12 (7)                                        |
| <b>Annual household income</b>               |                                               |                                               |
| >\$80 K                                      | 40 (30)                                       | 45 (29)                                       |
| \$40–80K                                     | 47 (35)                                       | 50 (32)                                       |
| \$20–40K                                     | 22 (16)                                       | 30 (19)                                       |
| <\$20K                                       | 26 (19)                                       | 31 (20)                                       |
| <b>PFAS concentrations (ng/mL)</b>           | Median (25 <sup>th</sup> , 75 <sup>th</sup> ) | Median (25 <sup>th</sup> , 75 <sup>th</sup> ) |
| PFOA                                         | 5.1 (3.6, 7.5)                                | 5.9 (4.2, 8.2)                                |
| PFOS                                         | 13.3 (9.0, 17.4)                              | 14.3 (10.1, 18.1)                             |
| PFHxS                                        | 1.2 (0.8, 2.3)                                | 1.7 (1.0, 2.4)                                |
| PFNA                                         | 0.9 (0.7, 1.2)                                | 1.0 (0.8, 1.3)                                |

<sup>a</sup>Below detection limit. PFAS concentrations were measured in maternal serum at 16 weeks of pregnancy. Note: PFAS, perfluoroalkyl substances; PFOA, perfluorooctanoate; PFOS, perfluorooctane sulfonate; PFHxS, perfluorohexane sulfonate; PFNA, perfluorononanoate. Data were complete for all variables. PFAS concentrations below LOD were replaced with LOD/√2.

**Table S2.** Baseline and follow-up characteristics and maternal plasma PFAS concentrations in the Project Viva (eastern Massachusetts; Enrolled 1999-2002).

| Characteristics                    | Baseline (N=371)<br>N (%)                        | Follow-up (N=342)<br>N (%)                       |
|------------------------------------|--------------------------------------------------|--------------------------------------------------|
| <b>Child sex</b>                   |                                                  |                                                  |
| Female                             | 175 (47)                                         | 163 (48)                                         |
| Male                               | 196 (53)                                         | 179 (52)                                         |
| <b>Child race</b>                  |                                                  |                                                  |
| White                              | 263 (71)                                         | 229 (67)                                         |
| Non-white                          | 108 (29)                                         | 113 (33)                                         |
| <b>Annual household income</b>     |                                                  |                                                  |
| >\$70,000                          | 222 (60)                                         | 210 (62)                                         |
| ≤\$70,000                          | 149 (40)                                         | 132 (38)                                         |
| <b>Maternal smoking status</b>     |                                                  |                                                  |
| Smoked in pregnancy                | 42 (11)                                          | 39 (11)                                          |
| Did not smoke in pregnancy         | 329 (89)                                         | 303 (89)                                         |
| <b>PFAS concentrations (ng/mL)</b> |                                                  |                                                  |
|                                    | <b>Median (25<sup>th</sup>, 75<sup>th</sup>)</b> | <b>Median (25<sup>th</sup>, 75<sup>th</sup>)</b> |
| PFOA                               | 5.7 (4.1, 7.5)                                   | 5.2 (3.6, 7.2)                                   |
| PFOS                               | 25.6 (18.5, 34.5)                                | 23.2 (16.9, 32.4)                                |
| PFHxS                              | 2.3 (1.6, 3.8)                                   | 2.2 (1.5, 3.7)                                   |
| PFNA                               | 0.7 (0.5, 0.9)                                   | 0.6 (0.5, 0.9)                                   |

Note: PFOA, perfluorooctanoate; PFOS, perfluorooctane sulfonate; PFHxS, perfluorohexane sulfonate; PFNA, perfluorononanoate; mean and SD for child age at follow-up visit was 7.9 (0.8) years. No missing values (excluded in participant flow if missing exposure, outcome, covariate).

**Table S3.** Distribution of serum per- and polyfluoroalkyl substance (PFAS) concentrations (ng/mL) in pregnancy (n=291) in the HOME Study (Cincinnati, OH; Enrolled 2003-2006)

| <b>PFAS</b> | <b>Minimum</b> | <b>25<sup>th</sup> Pctl</b> | <b>50<sup>th</sup> Pctl</b> | <b>75<sup>th</sup> Pctl</b> | <b>Maximum</b> |
|-------------|----------------|-----------------------------|-----------------------------|-----------------------------|----------------|
| PFHxS       | 0.1            | 0.9                         | 1.5                         | 2.3                         | 32.5           |
| PFNA        | 0.3            | 0.7                         | 0.9                         | 1.2                         | 2.9            |
| PFOA        | 1.1            | 3.8                         | 5.4                         | 7.8                         | 26.4           |
| PFOS        | 1.4            | 9.6                         | 13.7                        | 18.0                        | 57.2           |

**Table S4.** Pearson correlation between log<sub>2</sub>-transformed serum per- and polyfluoroalkyl substance (PFAS) concentrations (ng/mL) in pregnancy (n=291) in the HOME study (Cincinnati, OH; Enrolled 2003-2006).

|              | <b>PFOA</b> | <b>PFOS</b> | <b>PFNA</b> | <b>PFHxS</b> |
|--------------|-------------|-------------|-------------|--------------|
| <b>PFOA</b>  | 1.00        | 0.58        | 0.45        | 0.44         |
| <b>PFOS</b>  |             | 1.00        | 0.50        | 0.63         |
| <b>PFNA</b>  |             |             | 1.00        | 0.29         |
| <b>PFHxS</b> |             |             |             | 1.00         |

**Table S5.** Genes from statistically significant PFAS associated CpG sites and their potential human health implications in the HOME Study (Cincinnati, OH; Enrolled 2003-2006).

| Gene              | Description                                                          | PFAS  | Phenotype                                                                  |
|-------------------|----------------------------------------------------------------------|-------|----------------------------------------------------------------------------|
| MAGI1             | Membrane Associated Guanylate Kinase, WW and PDZ Domain Containing 1 | PFOA  | Breast cancer                                                              |
| KRT18             | Keratin 18                                                           | PFOA  | Prostate cancer; breast cancer-associated fibroblasts                      |
| SRPRB             | Signal Recognition Particle Receptor Subunit Beta                    | PFOA  | Pancreatic ductal adenocarcinoma                                           |
| TNR               | Tenascin R                                                           | PFOA  | Neural development; brain cancer                                           |
| SLC10A2           | Solute Carrier Family 10 Member 2                                    | PFOA  | Alzheimer's disease; cholesterol metabolism                                |
| LOC102724050      | Uncharacterized LOC102724050                                         | PFOA  | BMI                                                                        |
| AGAP1             | ArfGAP With GTPase Domain, Ankyrin Repeat and PH Domain 1            | PFOA  | Obesity; coronary artery disease                                           |
| SERPINA5          | Serpin Family A Member 5                                             | PFOA  | Kidney function; reproductive system; prostate cancers;                    |
| HPSE2             | Heparanase 2 (Inactive)                                              | PFOS  | Breast cancer; type II diabetes mellitus                                   |
| HIF1A             | Hypoxia Inducible Factor 1 Subunit Alpha                             | PFNA  | Pancreatic cancer; prostate cancer                                         |
| C14orf101         | Chromosome 14 Open Reading Frame 101                                 | PFNA  | Gastric cancer; non-Hodgkin lymphoma                                       |
| RADIL             | Rap Associating with DIL Domain                                      | PFNA  | Lung adenocarcinoma                                                        |
| DPAGT1            | Dolichyl-Phosphate N-Acetylglucosaminophosphotransferase 1           | PFNA  | Neuromuscular transmission disorders                                       |
| SLC6A2            | Solute Carrier Family 6 Member 2                                     | PFNA  | ADHD; depression; bipolar disorder                                         |
| TMEM56            | Transmembrane Protein 56                                             | PFNA  | Neurodevelopmental disorders; bipolar disorder                             |
| RNF13             | Ring Finger Protein 13                                               | PFNA  | Coronary artery disease; Parkinson's disease; pancreatic cancers           |
| EPB41L3           | Erythrocyte Membrane Protein Band 4.1 Like 3                         | PFNA  | Kidney function; prostate cancer; gastric cancer;                          |
| VIPR1             | Vasoactive Intestinal Peptide Receptor 1                             | PFHxS | Inflammatory bowel disease; lung adenocarcinoma; hepatocellular carcinoma; |
| CDSN;<br>PSORS1C1 | Corneodesmosin; Psoriasis Susceptibility 1 Candidate 1               | PFHxS | Psoriasis susceptibility; rheumatoid arthritis                             |

**Table S6.** A list of CpGs with p-value  $\leq 0.001$  provided by prior studies with the same direction of association and p-value  $< 0.05$  observed in the HOME Study (Cincinnati, OH; Enrolled 2003-2006)

| CpG        | Chr | CpG Location | Results from Prior Studies |             |         |          |      | Results from HOME Study |         |         |  |
|------------|-----|--------------|----------------------------|-------------|---------|----------|------|-------------------------|---------|---------|--|
|            |     |              | Gene                       | Gene Region | $\beta$ | P-value  | PFAS | Study                   | $\beta$ | P-value |  |
| cg00057676 | 1   | island       | C1orf220                   | Body        | -0.003  | 6.33E-04 | PFOA | Miura et al.            | -0.064  | 0.021   |  |
| cg03124880 | 12  | open sea     | WSCD2                      | Body        | 0.024   | 2.99E-04 | PFOA | Miura et al.            | 0.071   | 0.009   |  |
| cg03173827 | 20  | island       | TCEA2                      | 1stExon     | -0.024  | 6.77E-04 | PFOA | Miura et al.            | -0.021  | 0.032   |  |
| cg03191504 | 2   | shore        | RNF149                     | Body        | -0.013  | 8.58E-04 | PFOA | Miura et al.            | -0.048  | 0.031   |  |
| cg05012972 | 7   | island       | PTPRN2                     | Body        | -0.037  | 2.51E-04 | PFOA | Miura et al.            | -0.053  | 0.017   |  |
| cg11897736 | 13  | shore        | MCF2L                      | Body        | 0.011   | 2.36E-04 | PFOA | Miura et al.            | 0.058   | 0.024   |  |
| cg15224291 | 18  | open sea     | MBP                        | TSS200      | 0.007   | 4.73E-04 | PFOA | Miura et al.            | 0.052   | 0.022   |  |
| cg15997374 | 11  | shelf        | ATG2A                      | Body        | 0.002   | 5.73E-04 | PFOA | Miura et al.            | 0.025   | 0.032   |  |
| cg16022876 | 11  | shore        | BRSK2                      | Body        | 0.009   | 3.84E-04 | PFOA | Miura et al.            | 0.051   | 0.007   |  |
| cg16214582 | 4   | island       | RP3-513G18.2               | IGR         | 0.019   | 8.96E-04 | PFOA | Miura et al.            | 0.051   | 0.024   |  |
| cg16362594 | 6   | shore        | C6orf123                   | IGR         | 0.006   | 4.86E-04 | PFOA | Miura et al.            | 0.058   | 0.047   |  |
| cg15272467 | 20  | island       | YTHDF1                     | IGR         | 0.035   | 6.21E-04 | PFOS | Miura et al.            | 0.060   | 0.000   |  |
| cg14426688 | 7   | island       | STK17A                     | Body        | 0.006   | 9.11E-05 | PFOS | Miura et al.            | 0.032   | 0.015   |  |
| cg09475757 | 4   | island       | NEIL3                      | TSS200      | 0.018   | 8.90E-04 | PFOS | Miura et al.            | 0.052   | 0.036   |  |
| cg05146852 | 11  | open sea     | ANO3                       | Body        | 0.031   | 1.78E-04 | PFOS | Miura et al.            | 0.077   | 0.005   |  |
| cg26954114 | 15  | open sea     | MIR1469                    | IGR         | 0.072   | 4.87E-04 | PFOS | Miura et al.            | 0.040   | 0.008   |  |
| cg11835209 | 5   | open sea     | LINC01020                  | IGR         | 0.042   | 7.70E-04 | PFOS | Miura et al.            | 0.043   | 0.010   |  |
| cg14788655 | 11  | open sea     | LRRC4C                     | 5'UTR       | 0.041   | 2.99E-05 | PFOS | Miura et al.            | 0.069   | 0.012   |  |
| cg06899970 | 8   | open sea     | DKK4                       | 5'UTR       | 0.012   | 7.81E-04 | PFOS | Miura et al.            | 0.065   | 0.017   |  |
| cg00583535 | 1   | open sea     | IGFN1                      | TSS200      | 0.041   | 5.85E-04 | PFOS | Miura et al.            | 0.052   | 0.019   |  |
| cg09928274 | 19  | open sea     | ELSPBP1                    | 5'UTR       | 0.022   | 8.72E-06 | PFOS | Miura et al.            | 0.062   | 0.023   |  |
| cg09618309 | 2   | open sea     | LYG1                       | Body        | 0.01    | 1.46E-04 | PFOS | Miura et al.            | 0.052   | 0.031   |  |
| cg09860486 | 3   | open sea     | IQCF4                      | IGR         | 0.026   | 5.00E-04 | PFOS | Miura et al.            | 0.044   | 0.035   |  |
| cg27593250 | 6   | open sea     | DDR1                       | Body        | 0.035   | 6.18E-04 | PFOS | Miura et al.            | 0.035   | 0.044   |  |
| cg04057106 | 9   | open sea     | KIF24                      | Body        | 0.028   | 4.63E-04 | PFOS | Miura et al.            | 0.076   | 0.049   |  |
| cg14321373 | 8   | shelf        | KCNK9                      | 3'UTR       | 0.008   | 7.37E-04 | PFOS | Miura et al.            | 0.131   | 0.002   |  |
| cg25122824 | 7   | shore        | MAD1L1                     | Body        | -0.019  | 7.90E-04 | PFOS | Miura et al.            | -0.104  | 0.003   |  |
| cg24218620 | 17  | shore        | DHRS13                     | Body        | 0.039   | 5.57E-04 | PFOS | Miura et al.            | 0.041   | 0.005   |  |
| cg25697152 | 12  | shore        | TEAD4                      | TSS1500     | 0.023   | 5.17E-05 | PFOS | Miura et al.            | 0.064   | 0.006   |  |
| cg00220225 | 3   | shore        | SEMA3F                     | 5'UTR       | 0.043   | 5.56E-04 | PFOS | Miura et al.            | 0.045   | 0.009   |  |
| cg18486150 | 1   | shore        | KIF17                      | TSS1500     | 0.025   | 2.02E-04 | PFOS | Miura et al.            | 0.049   | 0.011   |  |
| cg07455279 | 19  | shore        | NDUFA3                     | TSS1500     | 0.044   | 2.83E-05 | PFOS | Miura et al.            | 0.077   | 0.013   |  |
| cg05162166 | 22  | shore        | ZC3H7B                     | IGR         | 0.019   | 9.03E-04 | PFOS | Miura et al.            | 0.023   | 0.018   |  |
| cg20251943 | 10  | shore        | DIP2C                      | Body        | 0.069   | 9.95E-05 | PFOS | Miura et al.            | 0.047   | 0.039   |  |
| cg18155888 | 1   | shore        | MORN1                      | Body        | 0.017   | 4.32E-06 | PFOS | Miura et al.            | 0.093   | 0.043   |  |
| cg00890632 | 10  | OpenSea      | PFKFB3                     | Body        | 0.027   | 0.0008   | PFOS | Starling et al.         | 0.047   | 0.039   |  |
| cg01253508 | 5   | Island       | -                          | -           | -0.020  | 0.0005   | PFOS | Starling et al.         | -0.053  | 0.036   |  |
| cg01861377 | 19  | OpenSea      | PPAP2C                     | Body        | 0.026   | 0.0002   | PFOS | Starling et al.         | 0.024   | 0.037   |  |
| cg01909551 | 3   | OpenSea      | -                          | -           | -0.030  | 0.0007   | PFOS | Starling et al.         | -0.041  | 0.003   |  |



|            |    |         |                    |                      |        |          |       |                 |        |       |
|------------|----|---------|--------------------|----------------------|--------|----------|-------|-----------------|--------|-------|
| cg03950246 | 15 | N_Shore | NEO1               | TSS1500              | 0.049  | 0.0002   | PFOS  | Starling et al. | 0.046  | 0.029 |
| cg14827285 | 13 | N_Shelf | -                  | -                    | -0.039 | 0.0008   | PFOS  | Starling et al. | -0.059 | 0.010 |
| cg16476639 | 14 | S_Shelf | RBM25              | 5'UTR                | -0.038 | 0.001    | PFOS  | Starling et al. | -0.050 | 0.038 |
| cg23987134 | 5  | OpenSea | LOC285696          | Body                 | 0.045  | 0.0009   | PFOS  | Starling et al. | 0.034  | 0.017 |
| cg00244391 | 6  | S_Shelf | C6orf182           | 5'UTR                | -0.035 | 1.96E-04 | PFNA  | Starling et al. | -0.074 | 0.021 |
| cg09706988 | 11 | Island  | AQP11              | TSS200               | -0.044 | 2.38E-04 | PFNA  | Starling et al. | -0.064 | 0.008 |
| cg11299207 | 6  | N_Shore | EHMT2              | TSS1500              | 0.029  | 4.81E-04 | PFNA  | Starling et al. | 0.046  | 0.045 |
| cg19346084 | 22 | Island  | -                  | -                    | 0.119  | 6.15E-04 | PFNA  | Starling et al. | 0.146  | 0.041 |
| cg19363466 | 19 | Island  | MZF1; LOC100131691 | Body                 | 0.042  | 8.17E-04 | PFNA  | Starling et al. | 0.068  | 0.020 |
| cg21330423 | 6  | Island  | HLA-J;NCRNA00171   | Body                 | -0.063 | 5.23E-05 | PFNA  | Starling et al. | -0.094 | 0.002 |
| cg22251017 | 19 | Island  | APLP1              | Body                 | 0.0147 | 5.52E-04 | PFNA  | Starling et al. | 0.051  | 0.044 |
| cg26831259 | 4  | S_Shore | KIAA1530           | Body                 | 0.0277 | 6.40E-04 | PFNA  | Starling et al. | 0.089  | 0.004 |
| cg27228559 | 10 | Island  | CASC2;RAB11FIP2    | Body;TSS1500         | -0.032 | 8.75E-04 | PFNA  | Starling et al. | -0.073 | 0.023 |
| cg00039070 | 7  | OpenSea | EXOC4              | Body;Body            | 0.039  | 1.91E-04 | PFHxS | Starling et al. | 0.038  | 0.045 |
| cg07052513 | 2  | Island  | KDM3A              | 5'UTR;TSS200;1stExon | 0.033  | 8.70E-04 | PFHxS | Starling et al. | 0.029  | 0.017 |
| cg08015507 | 3  | N_Shelf | NCKIPSD            | Body                 | 0.013  | 9.00E-04 | PFHxS | Starling et al. | 0.023  | 0.049 |
| cg10692932 | 12 | Island  | TROAP              | TSS200               | -0.052 | 2.27E-04 | PFHxS | Starling et al. | -0.027 | 0.014 |
| cg14328535 | 2  | OpenSea | MYT1L              | Body                 | 0.0315 | 2.32E-04 | PFHxS | Starling et al. | 0.046  | 0.008 |
| cg16433800 | 2  | Island  | PDK1               | 1stExon;5'UTR        | -0.053 | 4.47E-04 | PFHxS | Starling et al. | -0.015 | 0.032 |
| cg22661082 | 2  | OpenSea | -                  | -                    | 0.030  | 3.71E-04 | PFHxS | Starling et al. | 0.047  | 0.005 |
| cg00330059 | 4  | -       | ODZ3               | Body                 | 0.64   | 0.01     | PFOS  | Xu et al.*      | 0.077  | 0.014 |
| cg01192291 | 6  | S_Shore | ZKSCAN4            | TSS1500              | 0.7    | 0.003    | PFOS  | Xu et al.       | 0.070  | 0.013 |
| cg09157632 | 15 | -       | PIGB               | Body                 | 0.73   | 0.013    | PFOS  | Xu et al.       | 0.062  | 0.019 |
| cg09840146 | 5  | -       | -                  | -                    | 0.12   | 0.005    | PFOS  | Xu et al.       | 0.140  | 0.001 |
| cg16694239 | 1  | -       | PEA15              | 5'UTR;Body;TSS1500   | 0.61   | 0.003    | PFOS  | Xu et al.       | 0.031  | 0.007 |
| cg25025310 | 1  | -       | -                  | -                    | 0.84   | 0.013    | PFOS  | Xu et al.       | 0.090  | 0.005 |

Note: PFOA, perfluorooctanoate; PFOS, perfluorooctane sulfonate; PFHxS, perfluorohexane sulfonate; PFNA, perfluorononanoate; -, not annotated to any known gene; NA, not available in 450K microarray; Chr, chromosome; Body, between the ATG and stop codon; 5'UTR, between the TSS and the ATG start site; 1stExon, the first exon of the gene; TSS, transcription start site; TSS1500, 1500 bases from TSS; FDR, false discovery rate. Statistically significant CpG sites were defined as having FDR q-value <0.05 (PFOA, PFOS, and PFHxS) or 0.01 (PFNA); CpG sites were annotated to a promoter region if they were assigned to TSS200 or TSS1500. All models were adjusted for child age and sex, annual household income, maternal smoking during pregnancy and race, and cell type composition. \*Only q-values are available for Xu's study. CpGs with the same direction of effect and a P-value < 0.05 are shown.

**Figure S1.** Directed acyclic graph of potential confounders of the associations between serum PFAS concentrations in pregnancy and DNA methylation at birth and age 12 years in the HOME Study (Cincinnati, OH; Enrolled 2003-2006)

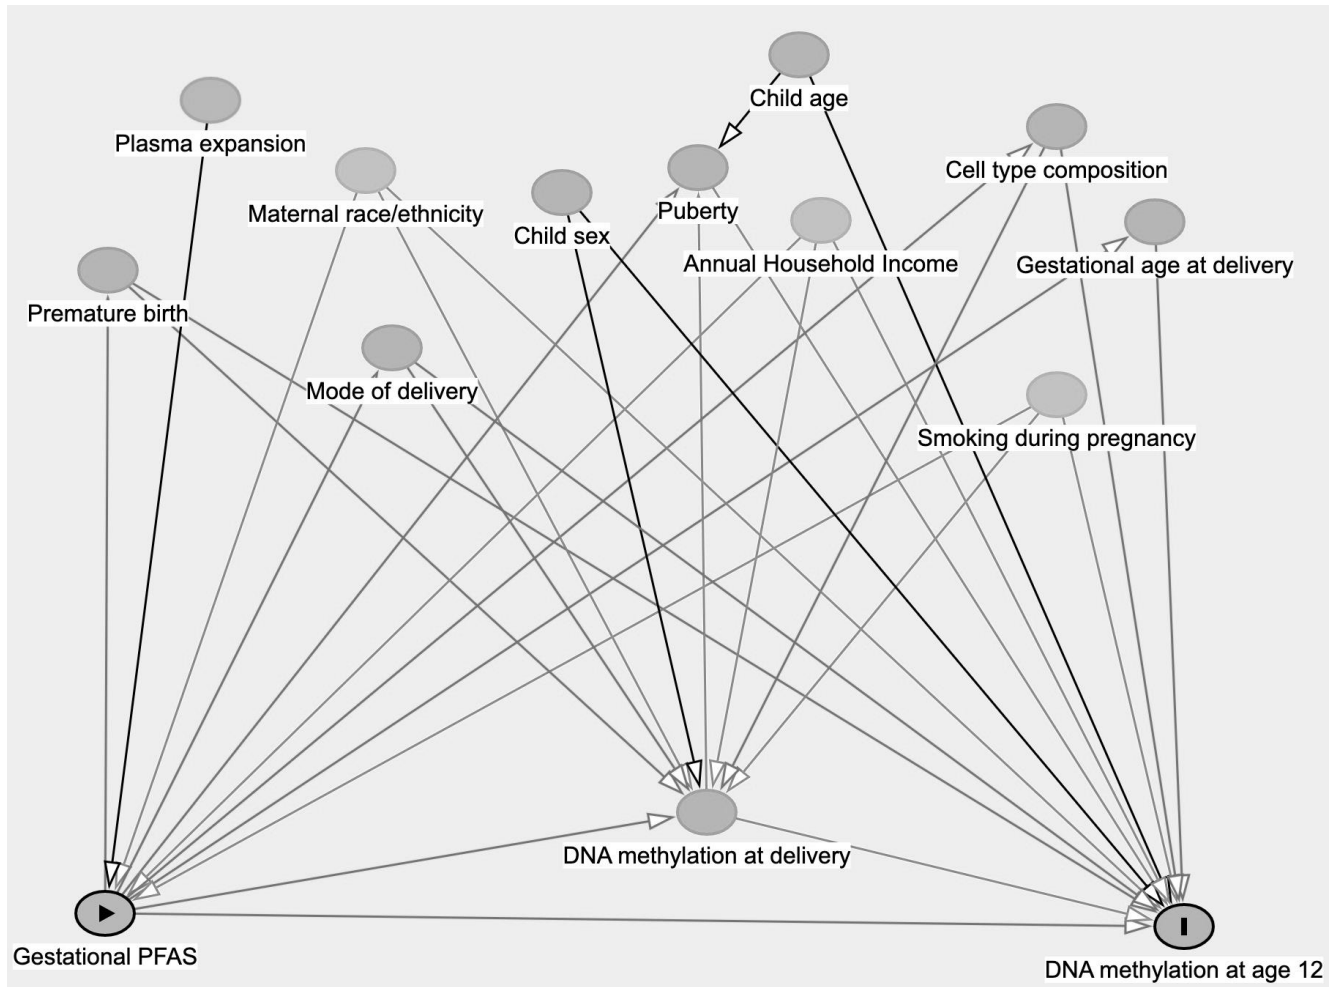

**Figure S2.** Box plot of serum per- and polyfluoroalkyl substance (PFAS) concentrations (ng/mL) in pregnancy in the HOME Study (Cincinnati, OH; Enrolled 2003-2006)

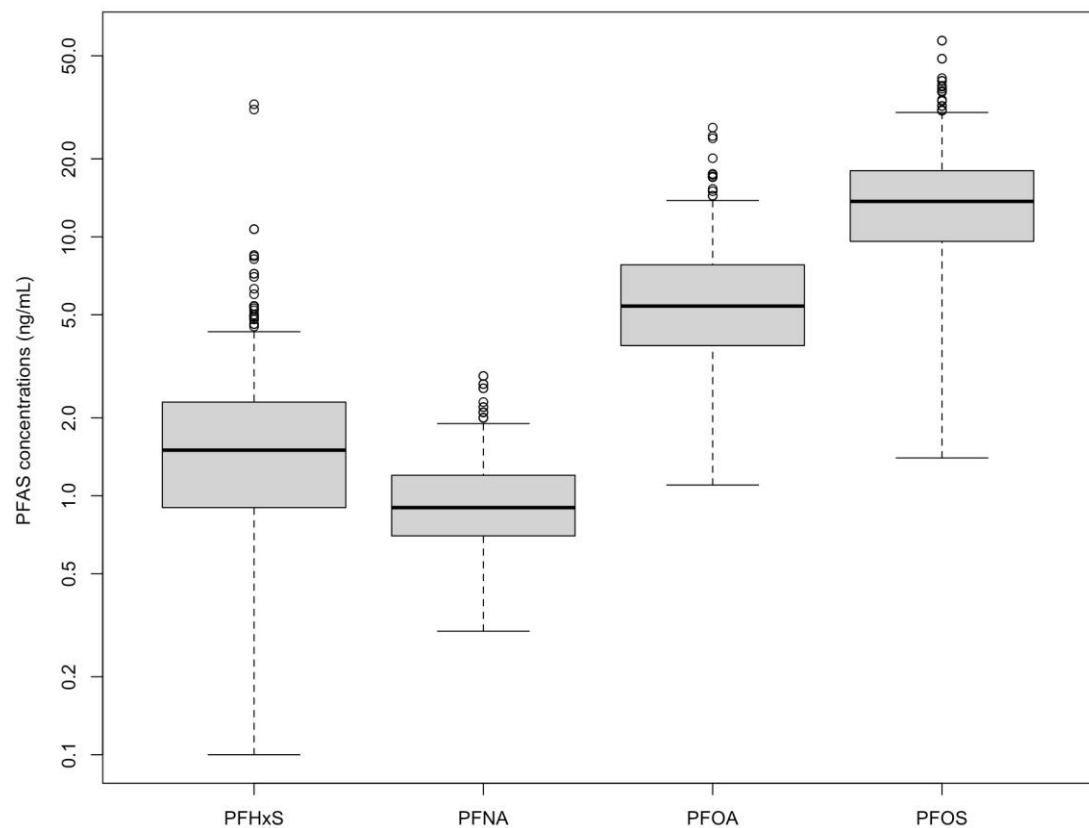

Note: PFOA, perfluorooctanoate; PFOS, perfluorooctane sulfonate; PFHxS, perfluorohexane sulfonate; PFNA, perfluorononanoate; FDR, false discovery rate; Dots placed past the line edges indicate outliers.

**Figure S3.** Quantile-quantile plots for the associations between gestational PFAS concentrations and repeated measures of DNA methylation in the HOME Study (Cincinnati, OH; Enrolled 2003-2006)

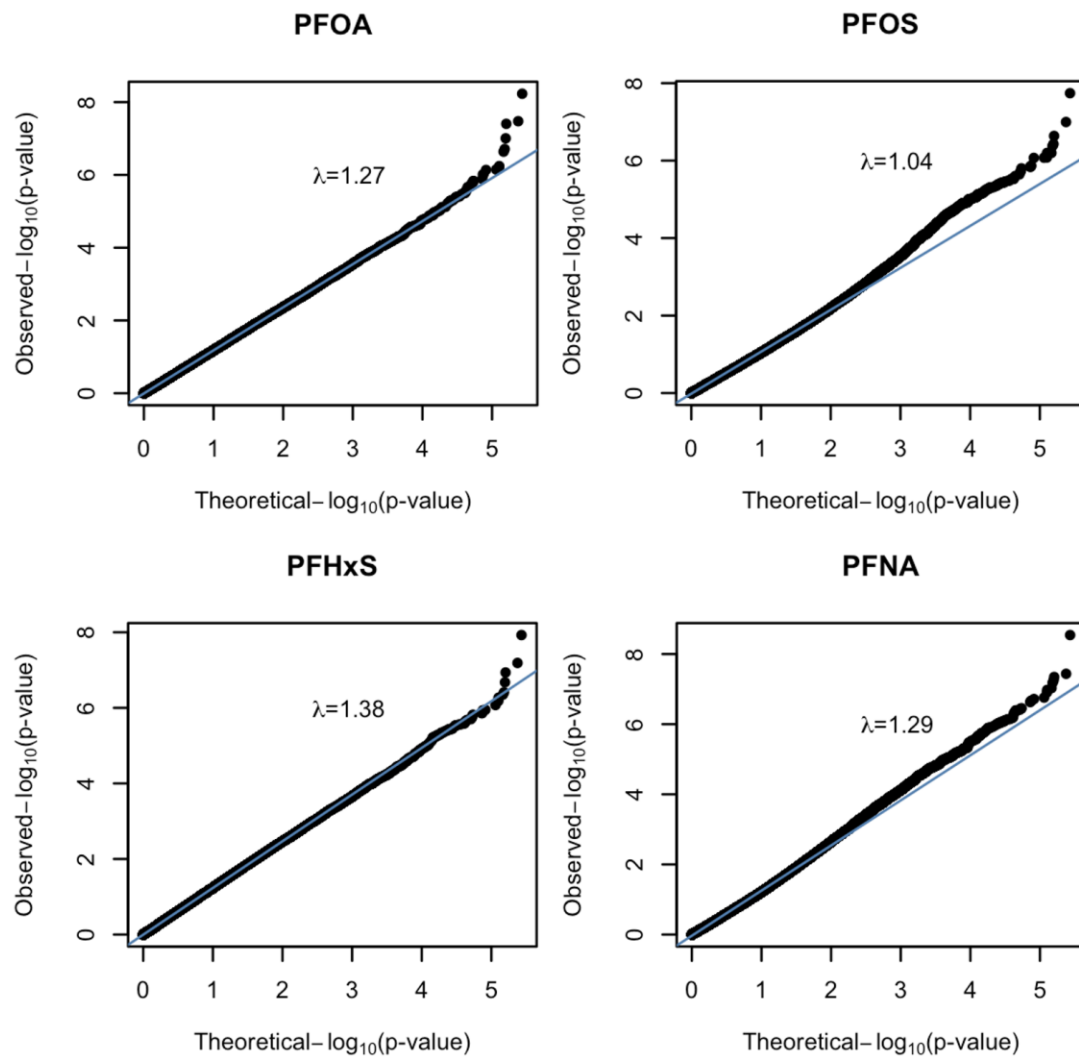

Note: PFOA, perfluorooctanoate; PFOS, perfluorooctane sulfonate; PFHxS, perfluorohexane sulfonate; PFNA, perfluorononanoate. Adjusted for child age and sex, annual household income, maternal smoking during pregnancy and race, and cell type composition.
