# Supplementary material
Source: PubMed Central journal article supplement (PMC8911098)
Supplement: ehp10118.smcontents.508.pdf [file ehp10118.smcontents.508.pdf]

**Note to readers with disabilities:** *EHP* strives to ensure that all journal content is accessible to all readers. However, some figures and Supplemental Material published in *EHP* articles may not conform to [508 standards](#) due to the complexity of the information being presented. If you need assistance accessing journal content, please contact [ehp508@niehs.nih.gov](mailto:ehp508@niehs.nih.gov). Our staff will work with you to assess and meet your accessibility needs within 3 working days.

### **Supplemental Material**

#### **Gestational Perfluoroalkyl Substance Exposure and DNA Methylation at Birth and 12 Years of Age: A Longitudinal Epigenome-Wide Association Study**

Yun Liu, Melissa N. Eliot, George D. Papandonatos, Karl T. Kelsey, Ruby Fore, Scott Langevin, Jessie Buckley, Aimin Chen, Bruce P. Lanphear, Kim M. Cecil, Kimberly Yolton, Marie-France Hivert, Sharon K. Sagiv, Andrea A. Baccarelli, Emily Oken, and Joseph M. Braun

#### **Table of Contents**

**Table S1.** Characteristics and maternal serum PFAS concentrations for participants with single or both measures of DNA methylation at birth and/or age 12 years in the HOME Study (Cincinnati, OH; Enrolled 2003-2006).

**Table S2.** Baseline and follow-up characteristics and maternal plasma PFAS concentrations in the Project Viva (eastern Massachusetts; Enrolled 1999-2002).

**Table S3.** Distribution of serum per- and polyfluoroalkyl substance (PFAS) concentrations (ng/mL) in pregnancy (n=291) in the HOME Study (Cincinnati, OH; Enrolled 2003-2006).

**Table S4.** Pearson correlation between log<sub>2</sub>-transformed serum per- and polyfluoroalkyl substance (PFAS) concentrations (ng/mL) in pregnancy (n=291) in the HOME study (Cincinnati, OH; Enrolled 2003-2006).

**Table S5.** Genes from statistically significant PFAS associated CpG sites and their potential human health implications in the HOME Study (Cincinnati, OH; Enrolled 2003-2006).

**Table S6.** A list of CpGs with p-value  $\leq 0.001$  provided by prior studies with the same direction of association and p-value  $< 0.05$  observed in the HOME Study (Cincinnati, OH; Enrolled 2003-2006).

**Figure S1.** Directed acyclic graph of potential confounders of the associations between serum PFAS concentrations in pregnancy and DNA methylation at birth and age 12 years in the HOME Study (Cincinnati, OH; Enrolled 2003-2006).

**Figure S2.** Box plot of serum per- and polyfluoroalkyl substance (PFAS) concentrations (ng/mL) in pregnancy in the HOME Study (Cincinnati, OH; Enrolled 2003-2006).

**Figure S3.** Quantile-quantile plots for the associations between gestational PFAS concentrations and repeated measures of DNA methylation in the HOME Study (Cincinnati, OH; Enrolled 2003-2006).

**Additional File-** Excel Document
